# Supplementary material for: Activation of Sigma-1 Receptor Alleviates ER-Associated Cell Death and Microglia Activation in Traumatically Injured Mice
Source: MDPI journal article supplement (doi:10.3390/jcm11092348), 2022-04-22
Supplement: s1 [file s1]

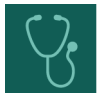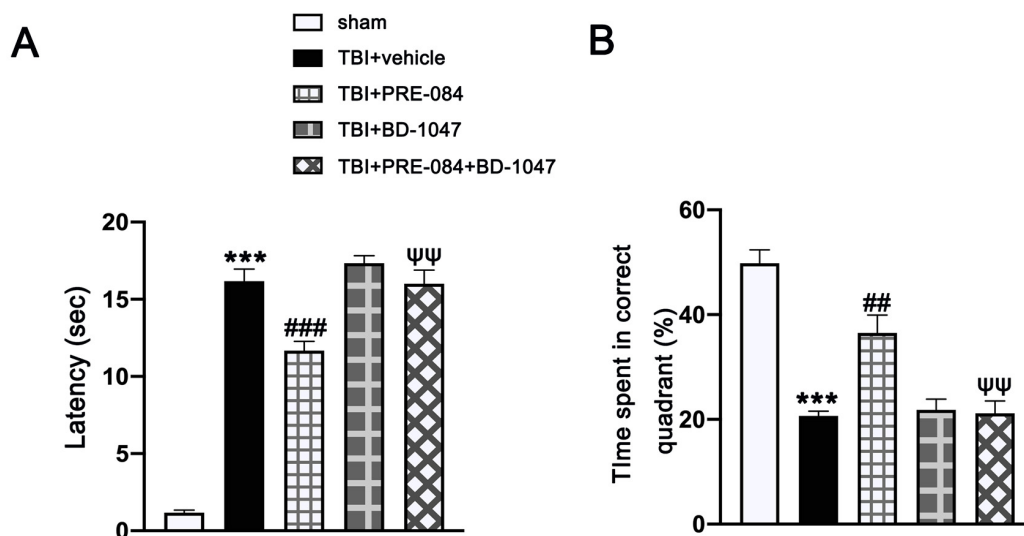

**Figure S1.** The effects of Sigma-1 receptor (Sig-1R) agonist PRE-084 and antagonist BD-1047 on behavioral effects after traumatic brain injury (TBI). (A) Quantitative analysis of latency and (B) the time spent in the correct quadrant in different groups after TBI.  $n = 6$  per group. Data are represented as mean  $\pm$  SEM. \*\*\*  $p < 0.001$  vs. sham group; ##  $p < 0.01$  and ###  $p < 0.001$  vs. TBI + Vehicle group; ψψ  $p < 0.01$  vs. TBI + PRE-084 group; one-way ANOVA, Tukey's post hoc test.
